# Supplementary material
Source: publisher figshare collection journal article supplement (https://acs.figshare.com/ndownloader/files/4370887)
Supplement: Supplementary file 1 [file 4370887]

**W/Mo-Oxide Nanomaterials:**

**Structure-Property Relationships and Ammonia Sensing Studies**

Ying Zhou<sup>1</sup>, Kaibo Zheng<sup>2, 3</sup>, Jan-Dierk Grunwaldt<sup>4</sup>, Thomas Fox<sup>1</sup>, Leilei Gu<sup>2</sup>, Xiaoliang Mo<sup>2</sup>,  
Guorong Chen<sup>2</sup>, Greta. R. Patzke<sup>1\*</sup>

**Table of Contents**

|                   |                                                                                                                                  |    |
|-------------------|----------------------------------------------------------------------------------------------------------------------------------|----|
| <b>Figure S1.</b> | XANES spectra of W/Mo-HTB-oxide and Na <sub>2</sub> MoO <sub>4</sub> as a reference.                                             | S2 |
| <b>Figure S2.</b> | Linear relationship of the average Mo valence and the corresponding Mo K-edge positions.                                         | S2 |
| <b>Figure S3.</b> | Representative first-shell fit of a W/Mo-HTB sample (a) at the W L <sub>3</sub> -edge and (b) at the Mo K-edge                   | S3 |
| <b>Figure S4.</b> | Representative SEM images of M-WMo-HTB samples before heat treatment                                                             | S4 |
| <b>Table S1.</b>  | Structural parameters derived from fitting of EXAFS spectra at the W L <sub>3</sub> -edge of M-WMo-HTBs (W-O bonds; M = Li - Rb) | S5 |
| <b>Table S2.</b>  | Structural parameters obtained from fitting of EXAFS spectra recorded at the Mo K-edge of M-WMo-HTBs (Mo-O bonds; M = Li - Rb)   | S6 |
| <b>Table S3.</b>  | Modeling of R-C values                                                                                                           | S7 |

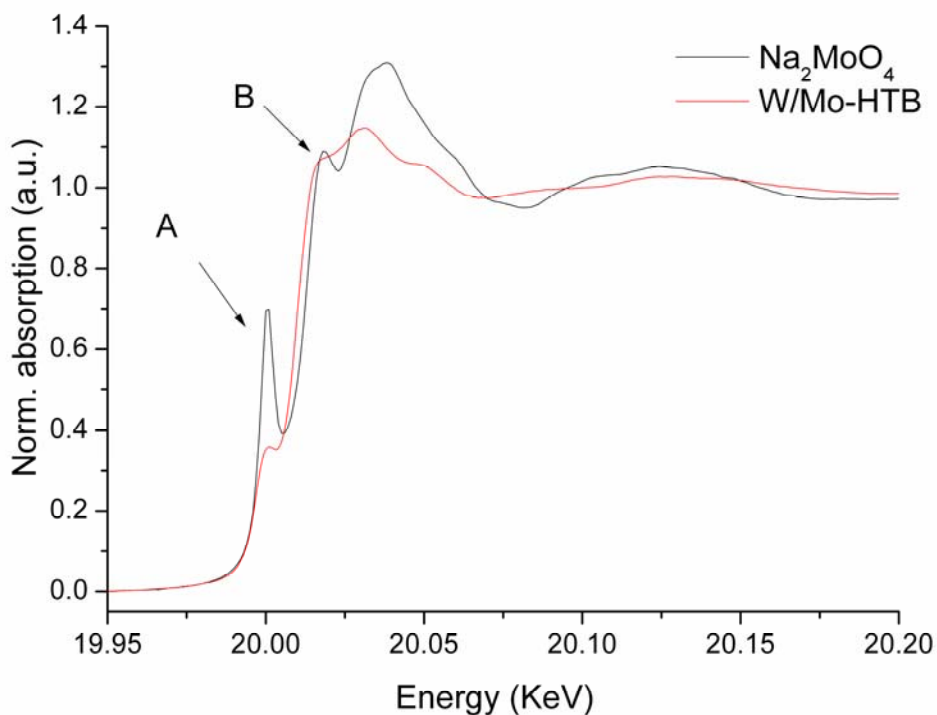

**Figure S1.** Comparison of representative Mo K-edge XANES spectra of W/Mo-HTB-oxide and  $\text{Na}_2\text{MoO}_4$  as a reference compound containing tetrahedrally coordinated Mo(VI).

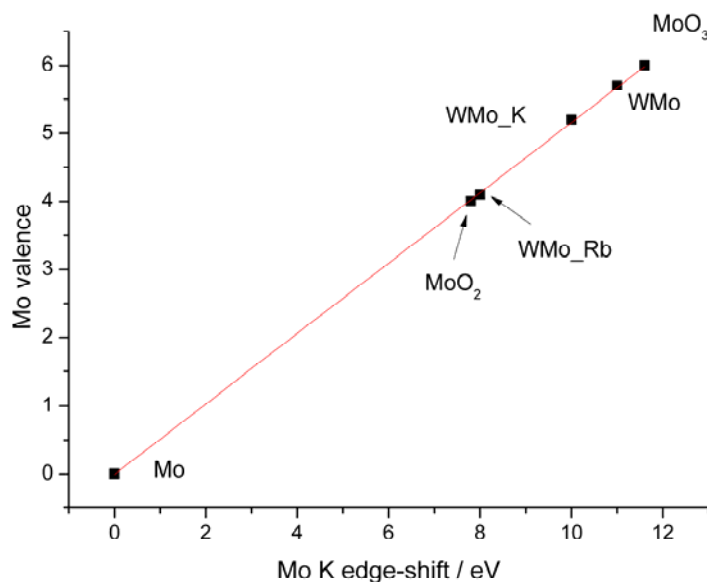

**Figure S2.** Linear relationship of the average Mo valence and the corresponding Mo K-edge positions.

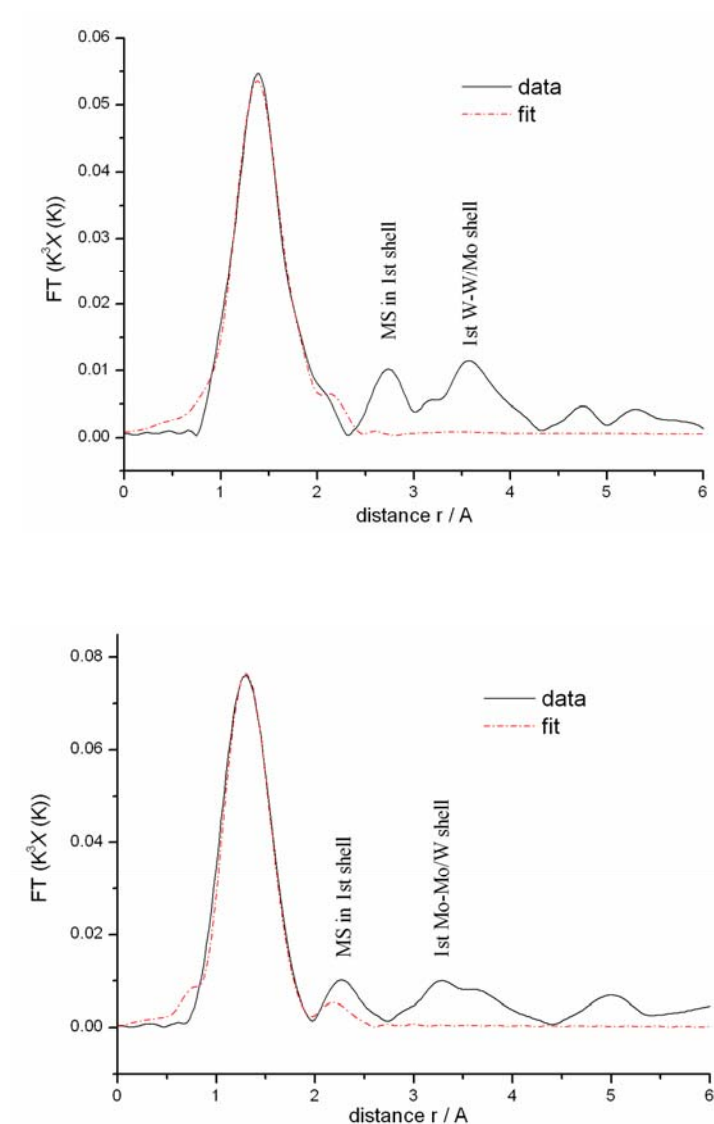

**Figure S3.** Representative first-shell fit of a W/Mo-HTB sample, considering the nearest oxygen neighbours (a) recorded at the W L<sub>3</sub>-edge and (b) recorded at the Mo K-edge.

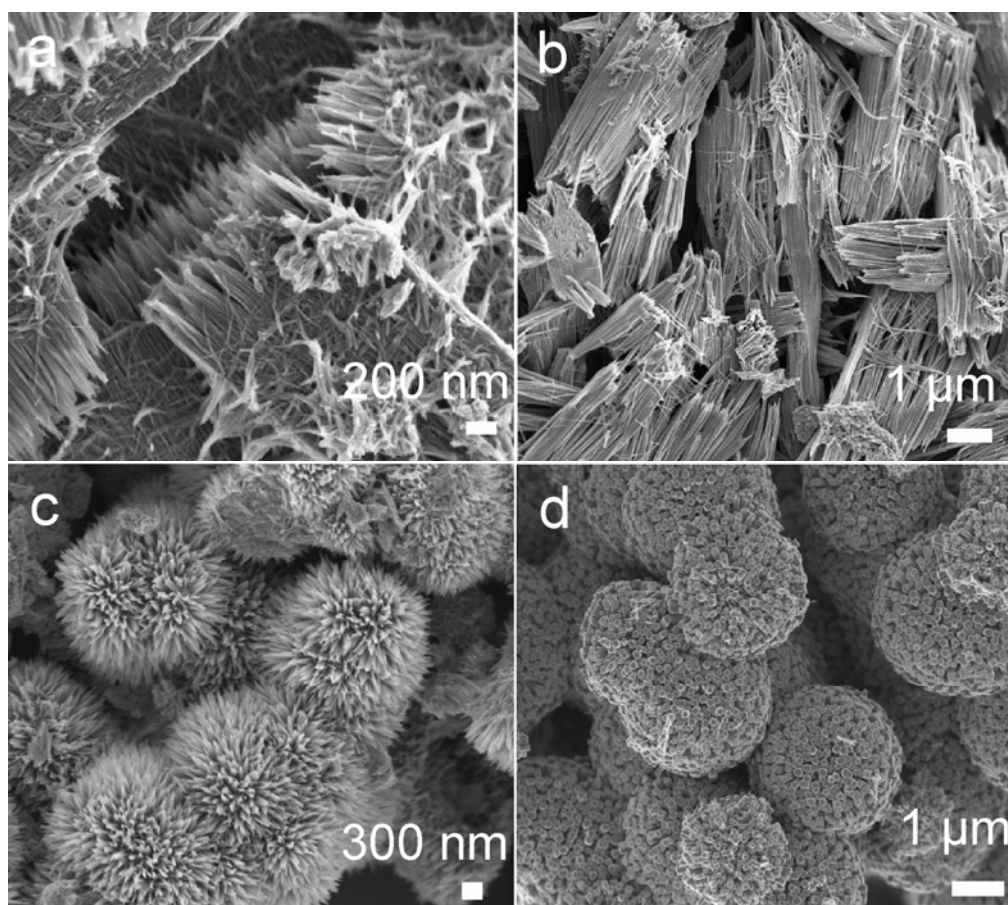

**Figure S4.** Representative SEM images of W/Mo-HTB samples before heat treatment: (a) Li\_W/Mo-HTB; (b) Na\_W/Mo-HTB; (c) K\_W/Mo-HTB; (d) Rb\_W/Mo-HTB.

**Table S1** Structural parameters derived from fitting of EXAFS spectra at the W L<sub>3</sub>-edge of M-WMo-HTBs (W-O bonds; M = Li - Rb).\*

| Samples | $N$ | $R / \text{\AA}$ | $\delta^2 / \text{\AA}^2$ | $\Delta E / eV$ | Residual |
|---------|-----|------------------|---------------------------|-----------------|----------|
| WMo     | 2.3 | 1.73             | 0.004                     | 12.2            | 7.0      |
|         | 1.9 | 1.83             | 0.004                     | 12.4            |          |
|         | 1.8 | 2.06             | 0.004                     | 12.5            |          |
| WMo_Li  | 2.2 | 1.74             | 0.004                     | 12.1            | 8.8      |
|         | 2.6 | 1.87             | 0.010                     | 12.2            |          |
|         | 1.2 | 2.10             | 0.002                     | 12.2            |          |
| WMo_Na  | 2.7 | 1.75             | 0.006                     | 12.2            | 9.9      |
|         | 1.4 | 1.81             | 0.004                     | 12.2            |          |
|         | 1.9 | 2.06             | 0.006                     | 12.3            |          |
| WMo_K   | 2.4 | 1.74             | 0.003                     | 12.4            | 7.0      |
|         | 1.8 | 1.89             | 0.006                     | 12.5            |          |
|         | 1.8 | 2.07             | 0.003                     | 12.6            |          |
| WMo_Rb  | 2.0 | 1.73             | 0.002                     | 12.9            | 6.6      |
|         | 2.4 | 1.87             | 0.006                     | 13.1            |          |
|         | 1.6 | 2.09             | 0.003                     | 13.2            |          |

\* $N$  = coordination number with the overall number 6,  $R$  = distance of the first oxygen coordination shell,  $\delta^2$  = Debye-Waller factor,  $\Delta E$  = energy shift and Residual = factor for the goodness of fit

**Table S2.** Structural parameters obtained from fitting of EXAFS spectra recorded at the Mo K-edge of M-WMo-HTBs (Mo-O bonds; M = Li - Rb).

| Samples | $N$ | $R / \text{\AA}$ | $\delta^2 / \text{\AA}^2$ | $\Delta E / eV$ | Residual |
|---------|-----|------------------|---------------------------|-----------------|----------|
| WMo     | 2.5 | 1.69             | 0.002                     | -6.6            | 5.8      |
|         | 1.3 | 1.80             | 0.005                     | 8.9             |          |
|         | 2.2 | 2.11             | 0.005                     | 9.6             |          |
| WMo_Li  | 2.0 | 1.72             | 0.001                     | 9.1             | 5.8      |
|         | 2.2 | 1.78             | 0.003                     | -12             |          |
|         | 1.8 | 2.11             | 0.003                     | 12              |          |
| WMo_Na  | 2.2 | 1.73             | 0.001                     | 11.9            | 4.6      |
|         | 2.3 | 1.80             | 0.004                     | -12             |          |
|         | 1.5 | 2.11             | 0.003                     | 12              |          |
| WMo_K   | 2.1 | 1.73             | 0.001                     | 12              | 5.0      |
|         | 2.1 | 1.79             | 0.003                     | -12             |          |
|         | 1.8 | 2.09             | 0.005                     | 12              |          |
| WMo_Rb  | 2.0 | 1.71             | 0.001                     | 9.3             | 7.3      |
|         | 2.4 | 1.78             | 0.004                     | -12             |          |
|         | 1.6 | 2.10             | 0.005                     | 12              |          |

The mean W/Mo-distances,  $R_m$ , were obtained from the following equation:

$$R_m = ((N_1R_1 + N_2R_2 + N_3R_3) / 6).$$

The W-O  $R_m$  range varied from 1.86 to 1.88 Å over the entire W/Mo-HTB series, whereas the corresponding Mo-O values covered a slightly shorter distance range between 1.84 and 1.87 Å.

**Table S3.** Modeling of R–C values ( $R_b$  = bulk resistance,  $R_{gb}$  and  $C_{gb}$  = grain resistance and capacitance, respectively).

| T=245 °C     | $R_b$ ( $\Omega$ ) | $R_{gb}$ ( $\Omega$ ) | $C_{gb}$ (F) |
|--------------|--------------------|-----------------------|--------------|
| W/Mo-HTBs    | 1.567E4            | 2.032E6               | 1.891E-11    |
| Li_W/Mo-HTBs | 7.319E3            | 2.571E5               | 2.831E-11    |
| Na_W/Mo-HTBs | 1.533E4            | 3.372E6               | 1.537E-11    |
| K_W/Mo-HTBs  | 1.473E4            | 2.675E7               | 1.291E-11    |
| Rb_W/Mo-HTBs | 114.8              | 1.124E7               | 1.47E-11     |
